# Supplementary material
Source: PubMed Central journal article supplement (PMC3781413)
Supplement: supp_113.206359_jpet206359_suppl_data.pdf [file supp_113.206359_jpet206359_suppl_data.pdf]

**Hepatocyte nuclear factor 1 regulates the expression of the organic cation transporter OCT1 via binding to an evolutionary conserved region in intron 1 of the *OCT1* gene**

Valerie P. O'Brien\*, Kristin Bokelmann\*, Jacqueline Ramírez, Karoline Jobst, Mark J. Ratain, Jürgen Brockmöller and Mladen V. Tzvetkov

Institute of Clinical Pharmacology, University Medical Center, Georg-August-Universität  
Göttingen, Germany

**Author affiliations:**

VPO, KB, KJ, JB and MVT

Institute of Clinical Pharmacology, University Medical Center, Georg-August-Universität  
Göttingen, Germany

JR, MJR

Department of Medicine, Section of Hematology/Oncology, The University of Chicago,  
Chicago, IL, USA

## ***Supplementary (O'Brien et al.)***

### **HNF 1A Genotyping Method**

*OCT1* polymorphisms were genotyped using single-base primer extension reaction as described previously (Tzvetkov et al., 2009). *HNF1A* polymorphisms were genotyped by multiplex single-base primer extension as follows: QIAGEN Multiplex PCR Kit (Qiagen, Hilden, Germany) was used to pre-amplify the five DNA regions harboring the analyzed polymorphisms. The amplification conditions were denaturation for 15 min at 95°C, followed by 35 amplification cycles of 30 s at 94°C, 90 s at 64°C and 1 min at 72°C, and a final elongation of 10 min at 72°C. The sequences and the concentrations of the primers used are given in supplementary table 1. The PCR products were purified by incubation with 2.5 U alkaline phosphatase and 3 U exonuclease I (both from MBI-Fermentas) for 1 hour at 37°C followed by an inactivation of the enzymes for 15 min at 80°C. The purified PCR products were used as templates for the single-base primer extension reaction. The reaction was performed using SNaPshot™ multiplex kit (Applied Biosystems) according to the manufacturer's instructions. The sequences and the concentrations of the primers used are given in supplementary table 1. The samples were analyzed on a 3130xl Genetic Analyses capillary sequencer and the genotype calling was performed using GeneMapper version 3.7 (both from Applied Biosystems). All samples were genotyped in duplicate with 100% concordance in the obtained results.

**Supplementary table 1.** Sequences of the primer used in the multiplex single-base primer extension genotyping of HNF1A SNPs

|                                       | Primer name | Sequence                                           | PCR amplicon length | Length of the extended primer | Concentration in the SNaPshot primer mix |
|---------------------------------------|-------------|----------------------------------------------------|---------------------|-------------------------------|------------------------------------------|
| PCR pre-amplification                 | HNF1_PCR1_f | 5'-GCCGAGCCATGGTTTCTAAACTGAG-3'                    | 266 bp.             |                               |                                          |
|                                       | HNF1_PCR1_r | 5'-GAGGATGGGTGGCGTGAAGTCTTCC-3'                    |                     |                               |                                          |
|                                       | HNF1_PCR2_f | 5'-CCCCACAGGGAGACCCACAGCAGAG-3'                    | 189 bp              |                               |                                          |
|                                       | HNF1_PCR2_r | 5'-CGGCCGCGGCTGGTTTTTCAACAGA-3'                    |                     |                               |                                          |
|                                       | HNF1_PCR3_f | 5'-TGGCCTCCACGCAGGCACAGAGTGT-3'                    | 193 bp.             |                               |                                          |
|                                       | HNF1_PCR3_r | 5'-TCACCGTGGGGGCTCTGCAGCTGAG-3'                    |                     |                               |                                          |
|                                       | HNF1_PCR4_f | 5'-CCTCCTCCCCATCTCTGAAGTCTGA-3'                    | 136 bp.             |                               |                                          |
|                                       | HNF1_PCR4_r | 5'-TCTGGAGGGGAGCTGACTTCTCAGT-3'                    |                     |                               |                                          |
|                                       | HNF1_PCR5_f | 5'-TCTGGCCCAAGACAGGTGCTCAAAA-3'                    | 230 bp              |                               |                                          |
|                                       | HNF1_PCR5_r | 5'-AGCCCTCCAGCTCCAGGTGAGAACT-3'                    |                     |                               |                                          |
| Primer extension reaction (SNaPshot™) | S487N       | 5'-CCATGGTGGCCATGAAGGGG- 3'                        |                     | 21 bp.                        | 1 μM                                     |
|                                       | rs7310409   | 5'- gatcgatCATGACTCACAGGTGGCATC- 3'                |                     | 29 bp.                        | 0.5 μM                                   |
|                                       | I27L        | 5'- (gact) <sub>3</sub> GGCTGAGCAAAGAGGCACTG- 3'   |                     | 33 bp.                        | 2 μM                                     |
|                                       | rs1183910   | 5'- (gact) <sub>4</sub> gaATGCGGAAACTGAGGCACAC- 3' |                     | 39 bp.                        | 2 μM                                     |
|                                       | rs1169313   | 5'- (gact) <sub>6</sub> gaGCCGCATCTACCCCATGGCC- 3' |                     | 43 bp.                        | 2 μM                                     |

**Supplementary table 2** HNF1A genotypes and HNF1A and OCT1 expression levels in the set of 40 human liver samples

| Sample ID | Gender | Age | Ile27Leu<br>rs1169288 | rs1183910 | rs7310409 | Ser487Asn<br>rs2464196 | rs1169313 | OCT1<br>expression<br>[transcripts /<br>transcript of TPB] |
|-----------|--------|-----|-----------------------|-----------|-----------|------------------------|-----------|------------------------------------------------------------|
| 156       | male   | 20  | Ile/Ile               | C/C       | G/G       | Ser/Ser                | T/T       | 2.9                                                        |
| 162       | male   | 18  | Ile/Ile               | C/C       | G/A       | Ser/Asn                | T/C       | 37.3                                                       |
| 174       | female | 23  | Ile/Ile               | C/C       | G/G       | Ser/Ser                | T/T       | 120.3                                                      |
| 175       | male   | 32  | Ile/Ile               | C/C       | G/G       | Ser/Ser                | T/C       | 60.2                                                       |
| 200       | female | 2   | Ile/Ile               | C/C       | G/G       | Ser/Ser                | T/T       | 34.6                                                       |
| 203       | male   | 13  | <b>Leu/Leu</b>        | T/T       | A/A       | <b>Asn/Asn</b>         | C/C       | <b>24.0</b>                                                |
| 204       | female | 8   | Ile/Leu               | C/T       | G/A       | Ser/Asn                | T/C       | 73.0                                                       |
| 217       | male   | 20  | Ile/Ile               | C/C       | G/G       | Ser/Ser                | T/T       | 13.9                                                       |
| 220       | male   | 36  | Ile/Leu               | C/T       | G/A       | Ser/Asn                | T/C       | 9.5                                                        |
| 223       | male   | 14  | Ile/Leu               | C/T       | G/A       | Ser/Asn                | T/C       | 15.3                                                       |
| 251       | male   | 7   | <b>Leu/Leu</b>        | T/T       | A/A       | <b>Asn/Asn</b>         | C/C       | <b>8.9</b>                                                 |
| 325       | male   | 60  | Ile/Ile               | C/C       | G/A       | Ser/Ser                | T/C       | 26.6                                                       |
| 331       | female | 62  | Ile/Ile               | C/C       | G/G       | Ser/Ser                | T/T       | 118.6                                                      |
| 332       | female | 65  | Ile/Leu               | C/T       | G/A       | Ser/Asn                | T/C       | 188.4                                                      |
| 333       | male   | 59  | Ile/Ile               | C/C       | G/A       | Ser/Ser                | T/C       | 41.4                                                       |
| 334       | male   | 63  | Ile/Ile               | C/C       | G/G       | Ser/Asn                | T/C       | 114.2                                                      |
| 335       | male   | 36  | Ile/Ile               | C/C       | G/G       | Ser/Ser                | T/T       | 84.7                                                       |
| 336       | male   | 70  | Ile/Ile               | C/C       | G/A       | Ser/Ser                | T/C       | 11.4                                                       |
| 337       | male   | 34  | Ile/Ile               | C/C       | G/G       | Ser/Ser                | T/T       | 45.2                                                       |
| 340       | male   | 52  | Ile/Leu               | C/T       | G/A       | Ser/Asn                | T/C       | 183.3                                                      |
| 341       | male   | 2   | Ile/Ile               | C/C       | G/A       | Ser/Ser                | T/T       | 8.8                                                        |
| 342       | male   | 43  | Ile/Leu               | C/T       | G/A       | Ser/Asn                | T/C       | 206.3                                                      |
| 343       | male   | 35  | Ile/Leu               | C/T       | A/A       | Ser/Ser                | T/C       | 17.2                                                       |
| 344       | male   | 63  | Ile/Ile               | C/C       | G/G       | Ser/Ser                | T/T       | 65.8                                                       |
| 346       | male   | 24  | Ile/Leu               | C/T       | A/A       | Ser/Asn                | C/C       | 77.7                                                       |
| 347       | female | 4   | Ile/Leu               | C/T       | G/A       | Ser/Asn                | T/C       | 10.8                                                       |
| 349       | male   | 2   | Ile/Ile               | C/C       | G/G       | Ser/Ser                | T/T       | 2.1                                                        |
| 352       | male   | 72  | Ile/Ile               | C/T       | G/A       | Ser/Asn                | T/C       | 8.9                                                        |
| 353       | female | 68  | Ile/Leu               | C/T       | A/A       | Ser/Asn                | C/C       | 103.3                                                      |
| 356       | male   | 37  | Ile/Leu               | C/T       | G/A       | Ser/Asn                | T/C       | 102.2                                                      |
| 358       | male   | 53  | Ile/Ile               | C/C       | G/G       | Ser/Ser                | T/T       | 101.2                                                      |
| 360       | male   | 54  | Ile/Ile               | C/C       | G/G       | Ser/Ser                | T/T       | 15.2                                                       |
| 837       | female | 40  | Ile/Leu               | C/T       | G/A       | Ser/Asn                | T/C       | 107.5                                                      |
| 845       | female | 10  | Ile/Ile               | C/C       | G/G       | Ser/Ser                | T/T       | 229.0                                                      |
| 849       | female | 46  | Ile/Ile               | C/C       | G/G       | Ser/Ser                | T/T       | 227.1                                                      |
| 852       | male   | 69  | Ile/Ile               | C/C       | G/A       | Ser/Ser                | T/C       | 249.0                                                      |
| 856       | male   | 67  | Ile/Leu               | C/T       | G/A       | Ser/Asn                | T/C       | 64.8                                                       |
| 860       | male   | 47  | Ile/Ile               | C/C       | G/G       | Ser/Ser                | T/T       | 138.8                                                      |
| 865       | male   | 34  | Ile/Ile               | C/C       | G/G       | Ser/Ser                | T/T       | 127.7                                                      |
| 867       | male   | 30  | Ile/Leu               | C/T       | G/A       | Ser/Asn                | T/C       | 79.3                                                       |

TBP, TATA-box binding protein.
